# Supplementary material
Source: publisher site journal article supplement (https://www.dovepress.com/article/259013)
Supplement: Supplementary file 1 [file get_supplementary_file.php]

APPENDIX I

Distribution of the participant’s responses regarding the importance of the data elements required for cancer diagnosis

| Data elements required for cancer diagnosis | | Very important | | Important | | Neutral | | Less important | | Not important | | Mean + SD | Median (Interquartile range) | First and third quartile | Agreement |
| --- | --- | --- | --- | --- | --- | --- | --- | --- | --- | --- | --- | --- | --- | --- | --- |
| Fr | % | Fr | % | Fr | % | Fr | % | Fr | % |
| 31 | Symptoms | 18 | 52.95 | 15 | 44.11 | 1 | 2.94 | 0 | 0 | 0 | 0 | 4.50 +0.56 | 5 (1) | 5 , 4 |  |
| 32 | Clinical examination results | 32 | 94.11 | 2 | 5.88 | 0 | 0 | 0 | 0 | 0 | 0 | 4.94+0.23 | 5 (0) | 5 , 5 |  |
| 33 | Patient history | 16 | 47.05 | 15 | 44.11 | 0 | 0 | 4 | 11.76 | 0 | 0 | 4.20+0.94 | 4 (1) | 5 , 4 |  |
| 34 | History of genetic diseases | 17 | 50 | 13 | 38.24 | 4 | 11.76 | 0 | 0 | 0 | 0 | 4.38+0.69 | 4 (1) | 5 , 4 |  |
| 35 | Current medications | 10 | 29.41 | 19 | 55.88 | 4 | 11.76 | 1 | 2.94 | 0 | 0 | 4.11+0.72 | 4 (1) | 5 , 4 |  |
| 36 | Food allergies | 3 | 8.82 | 1 | 2.94 | 10 | 29.41 | 12 | 35.29 | 8 | 23.52 | 2.38+1.15 | 2 (1) | 3 , 2 | * |
| 37 | Drug allergies | 5 | 14.7 | 8 | 23.52 | 10 | 29.41 | 9 | 26.47 | 2 | 5.88 | 3.14+1.15 | 3 (2) | 4 , 2 | * |
| 38 | History of smoking | 14 | 41.17 | 20 | 58.82 | 0 | 0 | 0 | 0 | 0 | 0 | 4.41+0.49 | 4 (1) | 5 , 4 |  |
| 39 | History of alcohol use | 12 | 35.29 | 19 | 55.88 | 2 | 5.88 | 1 | 2.94 | 0 | 0 | 4.23+0.69 | 4 (1) | 5 , 4 |  |
| 40 | Job-induced risk factors | 10 | 29.41 | 12 | 35.29 | 5 | 14.7 | 5 | 14.7 | 2 | 5.88 | 3.67+1.22 | 4 (2) | 5 , 3 | * |
| 41 | Previous paraclinical tests | 18 | 52.94 | 15 | 44.11 | 1 | 2.94 | 0 | 0 | 0 | 0 | 4.50+0.56 | 5 (1) | 5 , 4 |  |
| 42 | Patients’ test results | 18 | 52.94 | 14 | 41.17 | 2 | 5.88 | 0 | 0 | 0 | 0 | 4.47+0.61 | 5 (1) | 5 , 4 |  |
| 43 | Various types of imaging (sonography, endoscopy, CT-scan, colonoscopy, MRI) | 18 | 52.94 | 15 | 44.11 | 1 | 2.94 | 0 | 0 | 0 | 0 | 4.50+0.56 | 5 (1) | 5 , 4 |  |
| 44 | Imaging results | 18 | 52.94 | 13 | 38.23 | 3 | 8.82 | 0 | 0 | 0 | 0 | 4.44+0.66 | 5 (1) | 5 , 4 |  |
| 45 | Pathology results (morphology, position, grade of malignancy, and stages of cancer) | 20 | 58.82 | 12 | 35.29 | 2 | 5.88 | 0 | 0 | 0 | 0 | 4.52+0.61 | 5 (1) | 5 , 4 |  |
| 46 | Final diagnosis | 17 | 50 | 15 | 44.11 | 2 | 5.88 | 0 | 0 | 0 | 0 | 4.44+0.61 | 4.5 (1) | 5 , 4 |  |
| 47 | Medical consultation | 15 | 44.11 | 8 | 23.52 | 7 | 20.58 | 2 | 5.88 | 2 | 5.88 | 3.94+1.20 | 4 (2) | 5 , 3 |  |
| - Agreement   * No agreement | | | | | | | | | | | | | | | |

Distribution of the participant’s responses regarding the importance of the data elements required for cancer treatment

| Data elements required for cancer treatment | | | | Very important | | Important | | Neutral | | Less important | | Not important | | Mean + SD | Median (Interquartile range) | First and third quartile | Agreement |
| --- | --- | --- | --- | --- | --- | --- | --- | --- | --- | --- | --- | --- | --- | --- | --- | --- | --- |
| Fr | (%) | Fr | (%) | Fr | (%) | Fr | (%) | Fr | (%) |
| 48 | Medical care |  | Patient clinical history | 17 | 50 | 12 | 35.29 | 3 | 8.82 | 2 | 5.88 | 0 | 0 | 4.29+0.87 | 4.5 (1) | 5,4 |  |
| 49 |  | Medical consultation | 12 | 35.29 | 17 | 50 | 5 | 14.7 | 0 | 0 | 0 | 0 | 4.20+0.68 | 4(1) | 5,4 |  |
| 50 |  | Suggested  surgery | 19 | 55.88 | 14 | 41.17 | 1 | 2.94 | 0 | 0 | 0 | 0 | 4.52+0.56 | 5(1) | 5,4 |  |
| 51 | Radiotherapy | Patient consent | 10 | 29.41 | 15 | 44.11 | 3 | 8.82 | 2 | 5.88 | 4 | 11.76 | 3.73+1.28 | 4(1) | 5,4 | *  * |
| 52 | Health status | 17 | 50 | 16 | 47.05 | 0 | 0 | 1 | 2.94 | 0 | 0 | 4.44+0.66 | 4.5(1) | 5,4 |  |
| 53 | Laboratory tests results during radiotherapy | 14 | 41.17 | 13 | 38.23 | 5 | 14.7 | 2 | 5.88 | 0 | 0 | 4.14+0.89 | 4(1) | 5,4 |  |
| 54 | Tumor position | 19 | 55.88 | 9 | 26.47 | 6 | 17.64 | 0 | 0 | 0 | 0 | 4.38+0.77 | 5(1) | 5,4 |  |
| 55 | Radiotherapy care plan | 19 | 55.88 | 13 | 38.23 | 2 | 5.88 | 0 | 0 | 0 | 0 | 4.5+0.61 | 5(1) | 5,4 |  |
| 56 | Radiotherapy method | 21 | 61.76 | 12 | 35.29 | 1 | 2.94 | 0 | 0 | 0 | 0 | 4.58+0.55 | 5(1) | 5,4 |  |
| 57 | Amount of radiation | 17 | 50 | 13 | 38.23 | 4 | 11.76 | 0 | 0 | 0 | 0 | 4.38+0.69 | 4.5(1) | 5,4 |  |
| 58 | Type of radiation | 14 | 41.17 | 15 | 44.11 | 5 | 14.7 | 0 | 0 | 0 | 0 | 4.26+ 0.7 | 4(1) | 5,4 |  |
| 59 | Treatment courses | 18 | 52.94 | 15 | 44.11 | 1 | 2.94 | 0 | 0 | 0 | 0 | 4.50+0.56 | 5(1) | 5,4 |  |
| 60 | Radiotherapy complications | 11 | 32.35 | 7 | 29.41 | 12 | 35.29 | 4 | 11.76 | 0 | 0 | 3.73+1.05 | 4(2) | 5,3 | * |
| 61 | Patient follow up after radiotherapy | 16 | 47.05 | 17 | 50 | 1 | 2.94 | 0 | 0 | 0 | 0 | 4.44+0.56 | 4(1) | 5,4 |  |
| 62 | Chemotherapy | Health status | 15 | 44.11 | 16 | 47.05 | 0 | 0 | 3 | 8.82 | 0 | 0 | 4.26+0.86 | 4(1) | 5,4 |  |
| 63 | Required laboratory tests for chemotherapy | 19 | 55.88 | 15 | 44.11 | 0 | 0 | 0 | 0 | 0 | 0 | 4.55+0.5 | 5(1) | 5,4 |  |
| 64 | Chemotherapy drugs | 21 | 61.76 | 10 | 29.41 | 0 | 0 | 0 | 0 | 3 | 8.82 | 4.35+1.15 | 5(1) | 5,4 |  |
| 65 | Dosage of chemotherapy drugs | 18 | 52.94 | 11 | 23.35 | 5 | 14.7 | 0 | 0 | 0 | 0 | 4.38+0.73 | 5(1) | 5,4 |  |
| 66 | Method of chemotherapy drugs administration | 18 | 52.94 | 9 | 26.47 | 3 | 8.82 | 3 | 8.82 | 1 | 2.94 | 4.17+1.11 | 5(1) | 5,4 |  |
| 67 | Time of chemotherapy drugs administration | 21 | 61.76 | 11 | 32.35 | 1 | 2.94 | 0 | 0 | 1 | 2.94 | 4.50+0.82 | 5(1) | 5,4 |  |
| 68 | Starting date of chemotherapy | 23 | 67.64 | 11 | 32.35 | 0 | 0 | 0 | 0 | 0 | 0 | 4.67+0.47 | 5(1) | 5,4 |  |
| Data elements required for cancer treatment | | | | Very important | | Important | | Neutral | | Less important | | Not important | | Mean + SD | Median (Interquartile range) | First and third quartile | Agreement |
| Fr | (%) | Fr | (%) | Fr | (%) | Fr | (%) | Fr | (%) |
| 69 |  | Chemotherapy | Dates of future visits | 15 | 44.11 | 18 | 52.95 | 1 | 2.94 | 0 | 0 | 0 | 0 | 4.41+0.55 | 4(1) | 5,4 |  |
| 70 | Probable complication | 14 | 41.17 | 10 | 29.41 | 7 | 29.41 | 3 | 8.82 | 0 | 0 | 4.02+ 0.99 | 4(2) | 5, 3 |  |
| 71 | Injection courses | 17 | 50 | 16 | 47.05 | 1 | 2.94 | 0 | 0 | 0 | 0 | 4.47+0.56 | 4.5(1) | 5,4 |  |
| 72 | Time intervals between injections | 16 | 47.05 | 17 | 50 | 1 | 2.94 | 0 | 0 | 0 | 0 | 4.44+0.56 | 4(1) | 5,4 |  |
| 73 | Body surface area in chemotherapy | 14 | 41.17 | 8 | 23.52 | 1 | 2.94 | 11 | 32.35 | 0 | 0 | 3.73+1.3 | 4(3) | 5,2 | *  * |
| 74 | Drug interactions | 17 | 50 | 12 | 35.29 | 1 | 2.94 | 4 | 10.81 | 0 | 0 | 4.23+0.98 | 4.5(1) | 5,4 |  |
| 75 | Pharmacist’s approval | 8 | 23.52 | 9 | 26.47 | 9 | 26.47 | 8 | 23.52 | 0 | 0 | 3.50+ 1.1 | 3.5(1) | 4,3 | *  * |
| 76 | Hormone therapy | | 15 | 44.11 | 15 | 44.11 | 0 | 0 | 4 | 10.81 | 0 | 0 | 4.20+0.94 | 4(1) | 5,4 |  |
| 77 | Immunotherapy | | 15 | 44.11 | 18 | 52.94 | 0 | 0 | 1 | 2.94 | 0 | 0 | 4.38+0.65 | 4(1) | 5,4 |  |
| 78 | Nursing care | Vital signs control | | 14 | 41.17 | 9 | 26.47 | 5 | 14.7 | 0 | 0 | 6 | 17.64 | 3.73+1.46 | 4(2) | 5,3 | * |
| 79 | Consciousness assessment | | 13 | 38.23 | 10 | 29.41 | 4 | 10.81 | 3 | 8.82 | 4 | 10.81 | 3.73+1.37 | 4(2) | 5,3 | * |
| 80 | Disease progress report | | 10 | 29.41 | 12 | 35.29 | 5 | 14.7 | 7 | 29.41 | 0 | 0 | 3.73+1.1 | 4(2) | 5,3 | * |
| 81 | Nursing report | | 11 | 32.35 | 15 | 44.11 | 5 | 14.7 | 3 | 8.82 | 0 | 0 | 4.00+0.92 | 4(1) | 5,4 |  |
| 82 | Dates of chemotherapy drugs administration | | 14 | 41.17 | 14 | 41.17 | 6 | 17.64 | 0 | 0 | 0 | 0 | 4.23+0.74 | 4(1) | 5,4 |  |
| 83 | Dosage of chemotherapy drugs | | 20 | 58.82 | 8 | 23.52 | 4 | 10.81 | 2 | 5.88 | 0 | 0 | 4.35+0.91 | 5(1) | 5,4 |  |
| 84 | Discharge plan | | 13 | 38.23 | 6 | 17.64 | 6 | 17.64 | 6 | 17.64 | 3 | 8.82 | 3.58+1.39 | 4(2.75) | 5, 2.25 | *  * |
| 85 | Follow-up plan | | 12 | 35.29 | 15 | 44.11 | 4 | 10.81 | 3 | 8.82 | 0 | 0 | 4.05+0.91 | 4(1) | 5,4 |  |
| 86 | Patient education | | 14 | 41.17 | 13 | 38.13 | 4 | 10.81 | 3 | 8.82 | 0 | 0 | 4.11+0.94 | 4(1) | 5,4 |  |
| - Agreement   * No agreement | | | | | | | | | | | | | | | | | |

Distribution of the participant’s responses regarding the importance of the data elements required for mental care and pain relief

| Data elements required for mental care and pain relief | | | Very important | | Important | | Neutral | | Less important | | Not important | | Mean + SD | Median (Interquartile range) | First and third quartile | Agreement |
| --- | --- | --- | --- | --- | --- | --- | --- | --- | --- | --- | --- | --- | --- | --- | --- | --- |
| Fr | % | Fr | % | Fr | % | Fr | % | Fr | % |
| 87 | Mental care | Prescribed medications for mental care | 10 | 29.41 | 17 | 50 | 6 | 17.64 | 1 | 2.94 | 0 | 0 | 4.05+0.77 | 4(1) | 5,4 |  |
| 88 | Other procedures for mental care | 10 | 29.41 | 17 | 50 | 5 | 14.7 | 2 | 5.88 | 0 | 0 | 4.02+0.83 | 4(1) | 5,4 |  |
| 89 | Training patients and their caregivers | 11 | 32.35 | 19 | 55.88 | 4 | 10.81 | 0 | 0 | 0 | 0 | 4.20+0.64 | 4(1) | 5,4 |  |
| 90 | Supportive care | Prescribed medications for pain relief | 21 | 61.76 | 10 | 29.41 | 0 | 0 | 3 | 8.82 | 0 | 0 | 4.44+0.89 | 5(1) | 5,4 |  |
| 91 | Pain monitoring data | 15 | 44.11 | 15 | 44.11 | 3 | 8.82 | 1 | 2.94 | 0 | 0 | 4.29+0.75 | 4(1) | 5,4 |  |
| 92 | Percentage of pain relief | 12 | 35.29 | 16 | 47.05 | 3 | 8.82 | 3 | 8.82 | 0 | 0 | 4.08+0.9 | 4(1) | 5,4 |  |
| 93 | Training to improve nutritional status | 10 | 29.41 | 11 | 32.35 | 9 | 26.47 | 2 | 5.88 | 2 | 5.88 | 3.73+1.13 | 4(2) | 5,3 | *  * |
| - Agreement   * No agreement | | | | | | | | | | | | | | | | |

Distribution of the participant’s responses regarding the importance of the data elements required for the end-of-life care

| Data elements required for the end-of-life care | | Very important | | Important | | Neutral | | Less important | | Not important | | Mean +SD | Median (Interquartile range) | First and third quartile | Agreement |
| --- | --- | --- | --- | --- | --- | --- | --- | --- | --- | --- | --- | --- | --- | --- | --- |
| Fr | % | Fr | % | Fr | % | Fr | % | Fr | % |
| 94 | Spiritual challenges of patients and their families | 8 | 23.54 | 18 | 52.94 | 5 | 14.7 | 3 | 8.82 | 0 | 0 | 3.91+0.86 | 4(0) | 4,4 |  |
| 95 | Procedures to overcome spiritual challenges of patients and their families | 10 | 29.41 | 15 | 44.11 | 9 | 26.47 | 0 | 0 | 0 | 0 | 4.02+0.75 | 4(1.75) | 5, 3.25 |  |
| 96 | Prescribed medications for pain relief | 13 | 38.23 | 16 | 47.05 | 4 | 10.81 | 1 | 2.94 | 0 | 0 | 4.20+0.76 | 4(1) | 5,4 |  |
| 97 | Training to improve nutritional status | 11 | 32.35 | 13 | 38.23 | 7 | 29.41 | 3 | 8.82 | 0 | 0 | 3.94+0.95 | 4(2) | 5,3 |  |
| - Agreement   * No agreement | | | | | | | | | | | | | | | |

Distribution of the participant’s responses regarding the importance of the functional requirements of an oncology information system

| Functional requirements | | Very important | | Important | | Neutral | | Less important | | Not important | | Mean + SD | Median (Interquartile range) | First and third quartile | Agreement |
| --- | --- | --- | --- | --- | --- | --- | --- | --- | --- | --- | --- | --- | --- | --- | --- |
| Fr | % | Fr | % | Fr | % | Fr | % | Fr | % |
| 98 | obtaining an electronic patient consent for treatment | 16 | 47.05 | 18 | 52.94 | 0 | 0 | 0 | 0 | 0 | 0 | 4.47+0.5 | 4(1) | 5,4 |  |
| 99 | Applying DICOM-RT standard in radiotherapy | 13 | 38.23 | 15 | 44.11 | 6 | 17.64 | 0 | 0 | 0 | 0 | 4.20+0.72 | 4(1) | 5,4 |  |
| 100 | Treatment scheduling | 13 | 38.23 | 9 | 26.47 | 8 | 23.52 | 4 | 10.81 | 0 | 0 | 3.91+1.05 | 4(2) | 5, 3 |  |
| 101 | Scanning medication bar codes | 15 | 44.11 | 13 | 38.23 | 6 | 17.64 | 0 | 0 | 0 | 0 | 4.26+0.75 | 4.5(1) | 5,4 |  |
| 102 | Scanning patient’s wristband barcode for drug approval | 15 | 44.11 | 11 | 32.35 | 5 | 14.7 | 3 | 8.82 | 0 | 0 | 4.11+0.97 | 5(1) | 5,4 |  |
| 103 | Coding data by using ICD-O | 20 | 58.82 | 13 | 38.23 | 1 | 2.94 | 0 | 0 | 0 | 0 | 4.55+0.56 | 5(1) | 5,4 |  |
| 104 | Collecting genetic counseling results | 17 | 50 | 13 | 38.23 | 3 | 8.82 | 1 | 2.94 | 0 | 0 | 4.35+0.77 | 4.5(1) | 5,4 |  |
| 105 | Reporting | 14 | 41.17 | 10 | 29.41 | 10 | 29.41 | 0 | 0 | 0 | 0 | 4.11+0.84 | 4(2) | 5, 3 |  |
| 106 | Calculating quality of care indicators | 16 | 47.05 | 11 | 32.35 | 7 | 20.58 | 0 | 0 | 0 | 0 | 4.26+0.79 | 4(1) | 5,4 |  |
| 107 | Calculating survival rate | 16 | 47.05 | 8 | 23.52 | 10 | 29.41 | 0 | 0 | 0 | 0 | 4.17+0.86 | 4(2) | 5, 3 |  |
| 108 | Statistical analyses | 12 | 35.29 | 15 | 44.11 | 7 | 20.58 | 0 | 0 | 0 | 0 | 4.14+0.74 | 4(1) | 5,4 |  |
| 109 | Information access control | 21 | 61.76 | 11 | 32.35 | 2 | 5.88 | 0 | 0 | 0 | 0 | 4.55+0.61 | 5(1) | 5,4 |  |
| 110 | Assigning unique identifier numbers to patients | 19 | 55.88 | 9 | 26.47 | 6 | 17.64 | 0 | 0 | 0 | 0 | 4.38+0.77 | 5(1) | 5,4 |  |
| 111 | Assigning unique identifier numbers to providers | 18 | 52.94 | 9 | 26.47 | 7 | 20.58 | 0 | 0 | 0 | 0 | 4.32+0.8 | 5(1) | 5,4 |  |
| 112 | Data protection | 24 | 70.58 | 6 | 17.64 | 4 | 10.81 | 0 | 0 | 0 | 0 | 4.58+0.7 | 5(1) | 5,4 |  |
| 113 | Digital signature | 15 | 44.11 | 10 | 29.41 | 9 | 26.47 | 0 | 0 | 0 | 0 | 4.17+ 0.83 | 4(1.75) | 5, 3.25 |  |
| 114 | Integration with other clinical information system | 20 | 58.82 | 8 | 23.52 | 6 | 17.64 | 0 | 0 | 0 | 0 | 4.41+0.78 | 5(1) | 5,4 |  |
| 115 | Integration with other patient clinical data from external sources | 15 | 44.11 | 8 | 23.52 | 1 | 2.94 | 0 | 0 | 0 | 0 | 4.70+ 0.52 | 5(0.75) | 5, 4.25 |  |
| 116 | Integration with medical devices | 19 | 55.88 | 11 | 32.35 | 4 | 10.81 | 0 | 0 | 0 | 0 | 4.44+ 0.7 | 5(1) | 5,4 |  |
| 117 | Electronic prescription | 19 | 55.88 | 15 | 44.11 | 0 | 0 | 0 | 0 | 0 | 0 | 4.55+ 0.5 | 5(1) | 5,4 |  |
| 118 | Applying data interchange standards (e.g., HL7) | 14 | 41.17 | 12 | 35.29 | 8 | 23.52 | 0 | 0 | 0 | 0 | 4.17+ 0.79 | 4(1) | 5,4 |  |
| 119 | Integration with a patient portal | 12 | 35.29 | 15 | 44.11 | 6 | 17.64 | 0 | 0 | 0 | 0 | 4.08+ 0.9 | 4(1) | 5,4 |  |
| - Agreement   * No agreement | | | | | | | | | | | | | | | |
